# Supplementary material for: Liver Stiffness Hinders Normalization of Systemic Inflammation and Endothelial Activation after Hepatitis C Virus (HCV) Eradication in HIV/HCV Coinfected Patients
Source: MDPI journal article supplement (doi:10.3390/vaccines8020323), 2020-06-19
Supplement: s1 [file s1]

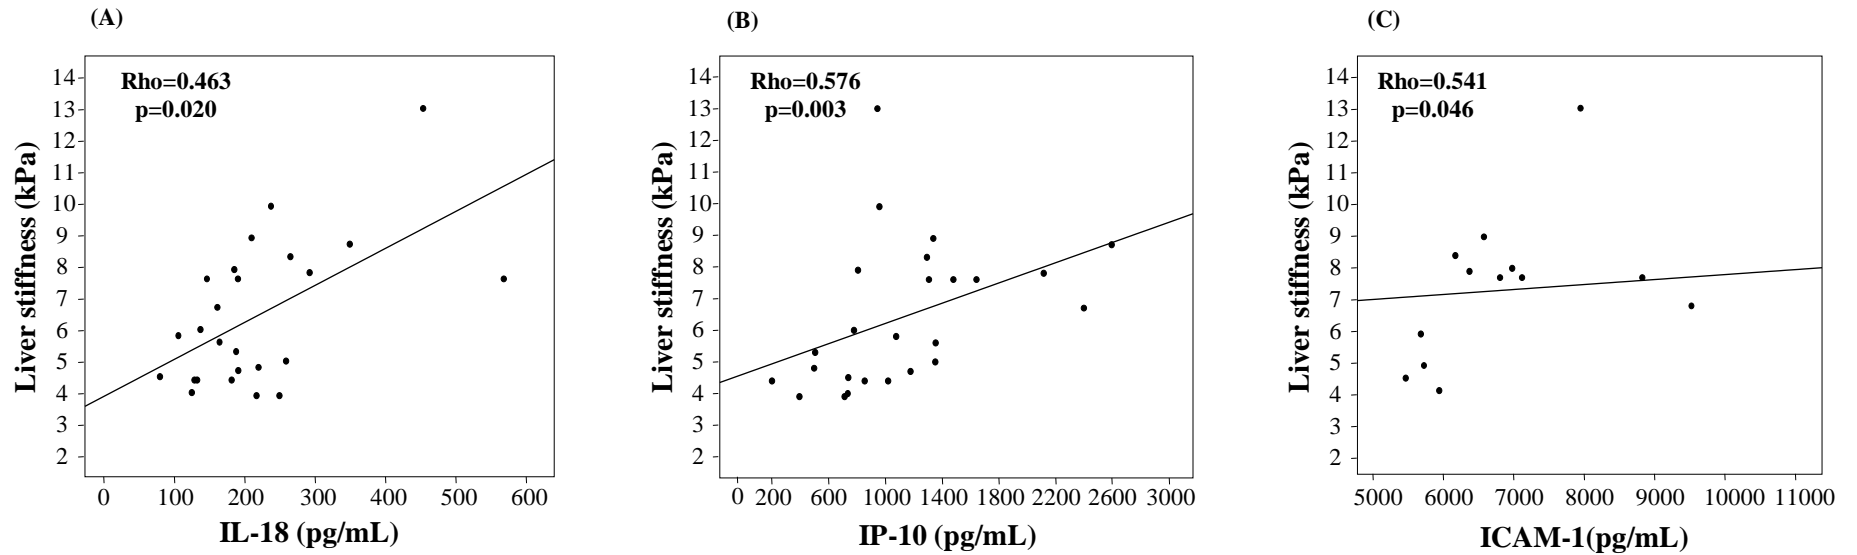

**Figure S1.** Scatter-plots graphs showing the correlations between baseline levels of IL-18 (A), IP-10 (B), and ICAM-1 (C) with baseline (before DAAs treatment) levels of liver stiffness in HIV/HCV patients. Spearman's rank correlation coefficient and p-value are shown inside the graphs.
