# Supplementary material for: Liver Stiffness Hinders Normalization of Systemic Inflammation and Endothelial Activation after Hepatitis C Virus (HCV) Eradication in HIV/HCV Coinfected Patients
Source: MDPI journal article supplement (doi:10.3390/vaccines8020323), 2020-06-19
Supplement: s1 [file s1]

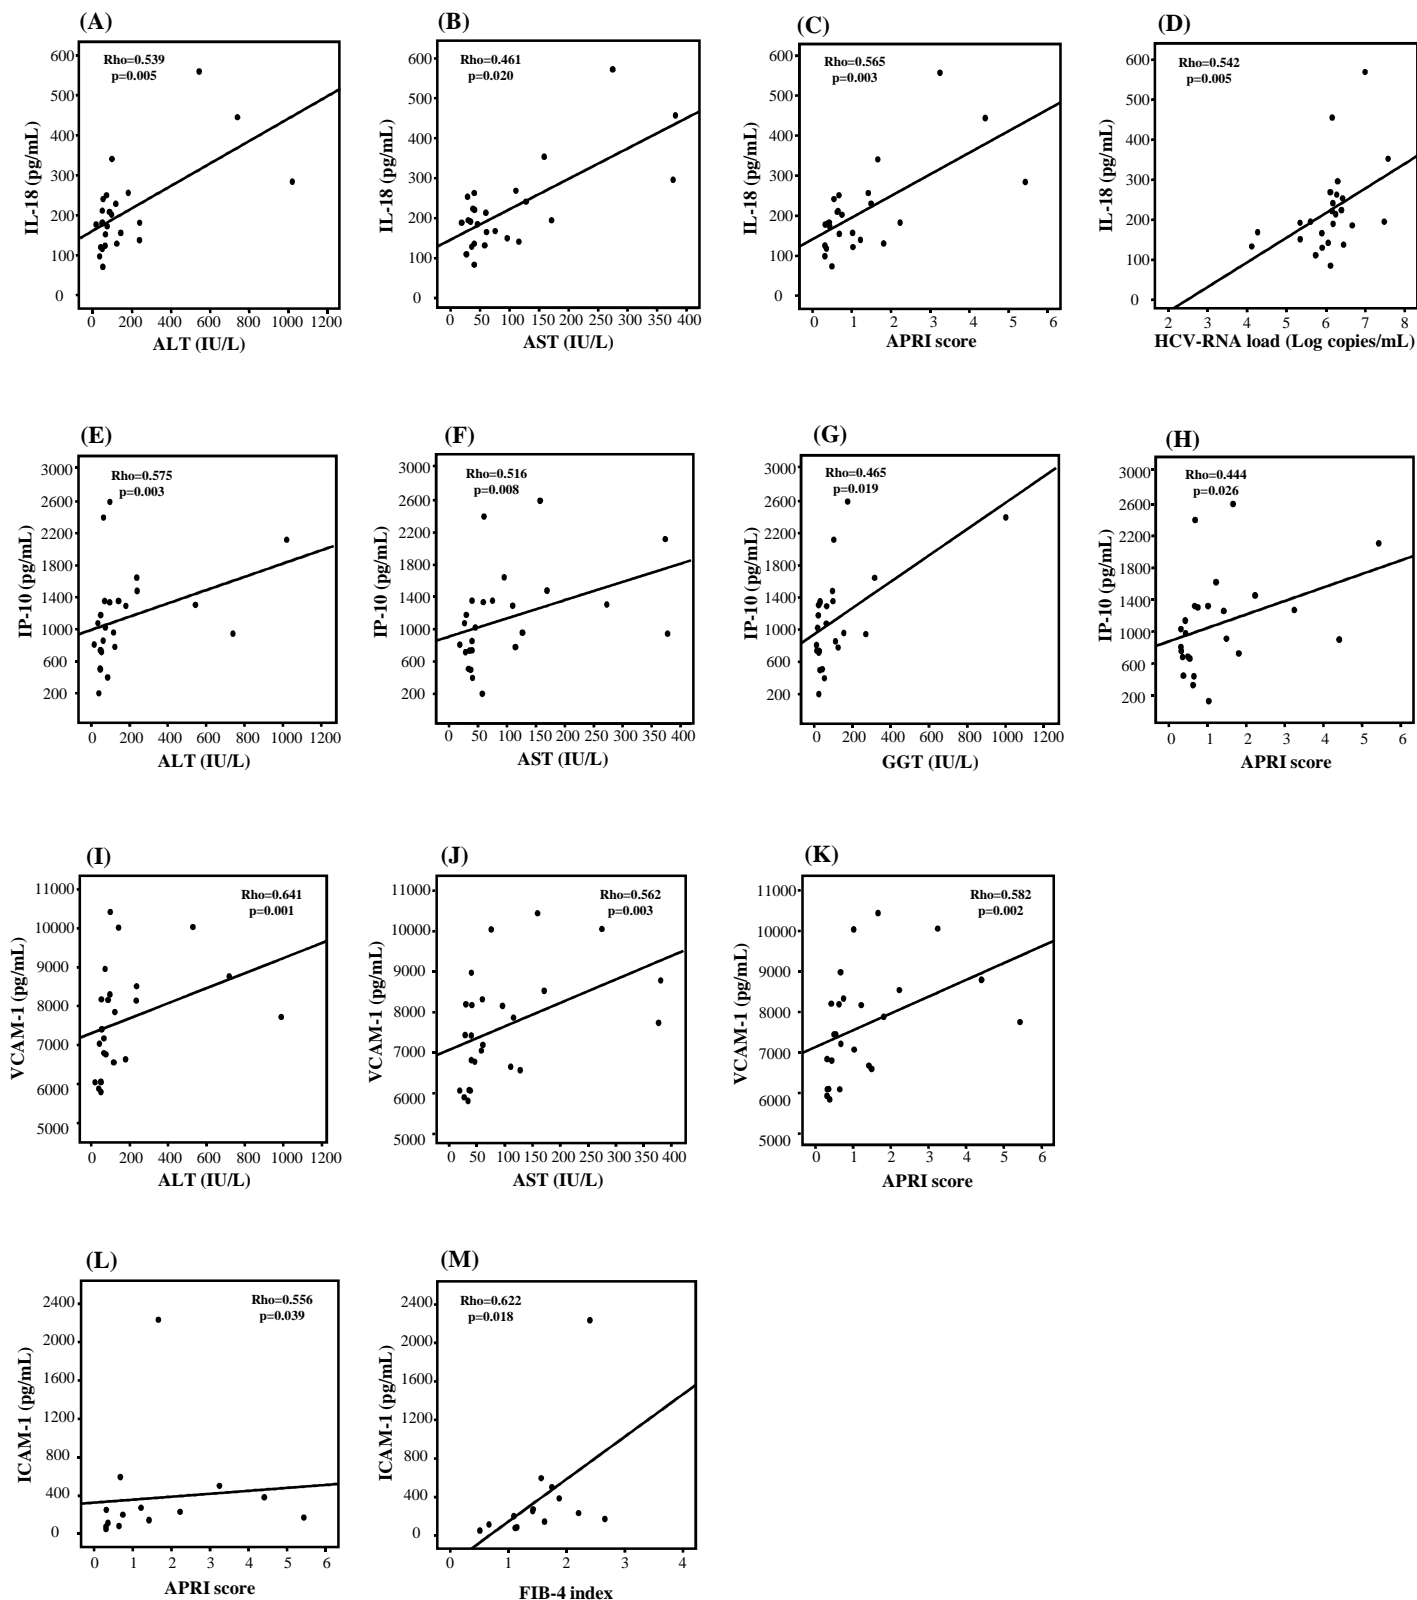

**Figure S3.** Scatter-plots showing the correlations between baseline (pre-DAA treatment) levels of IL-18 (A, B, C, D), IP-10 (E, F, G, H), VCAM-1 (I, J, K) and ICAM-1 (L, M) with baseline levels of liver enzymes (ALT, AST and GGT), APRI score, FIB-4 index and HCV-RNA plasma viral load. Spearman's rank correlation coefficient and p-value are shown inside the graphs.
