# Supplementary material for: Liver Stiffness Hinders Normalization of Systemic Inflammation and Endothelial Activation after Hepatitis C Virus (HCV) Eradication in HIV/HCV Coinfected Patients
Source: MDPI journal article supplement (doi:10.3390/vaccines8020323), 2020-06-19
Supplement: s1 [file s1]

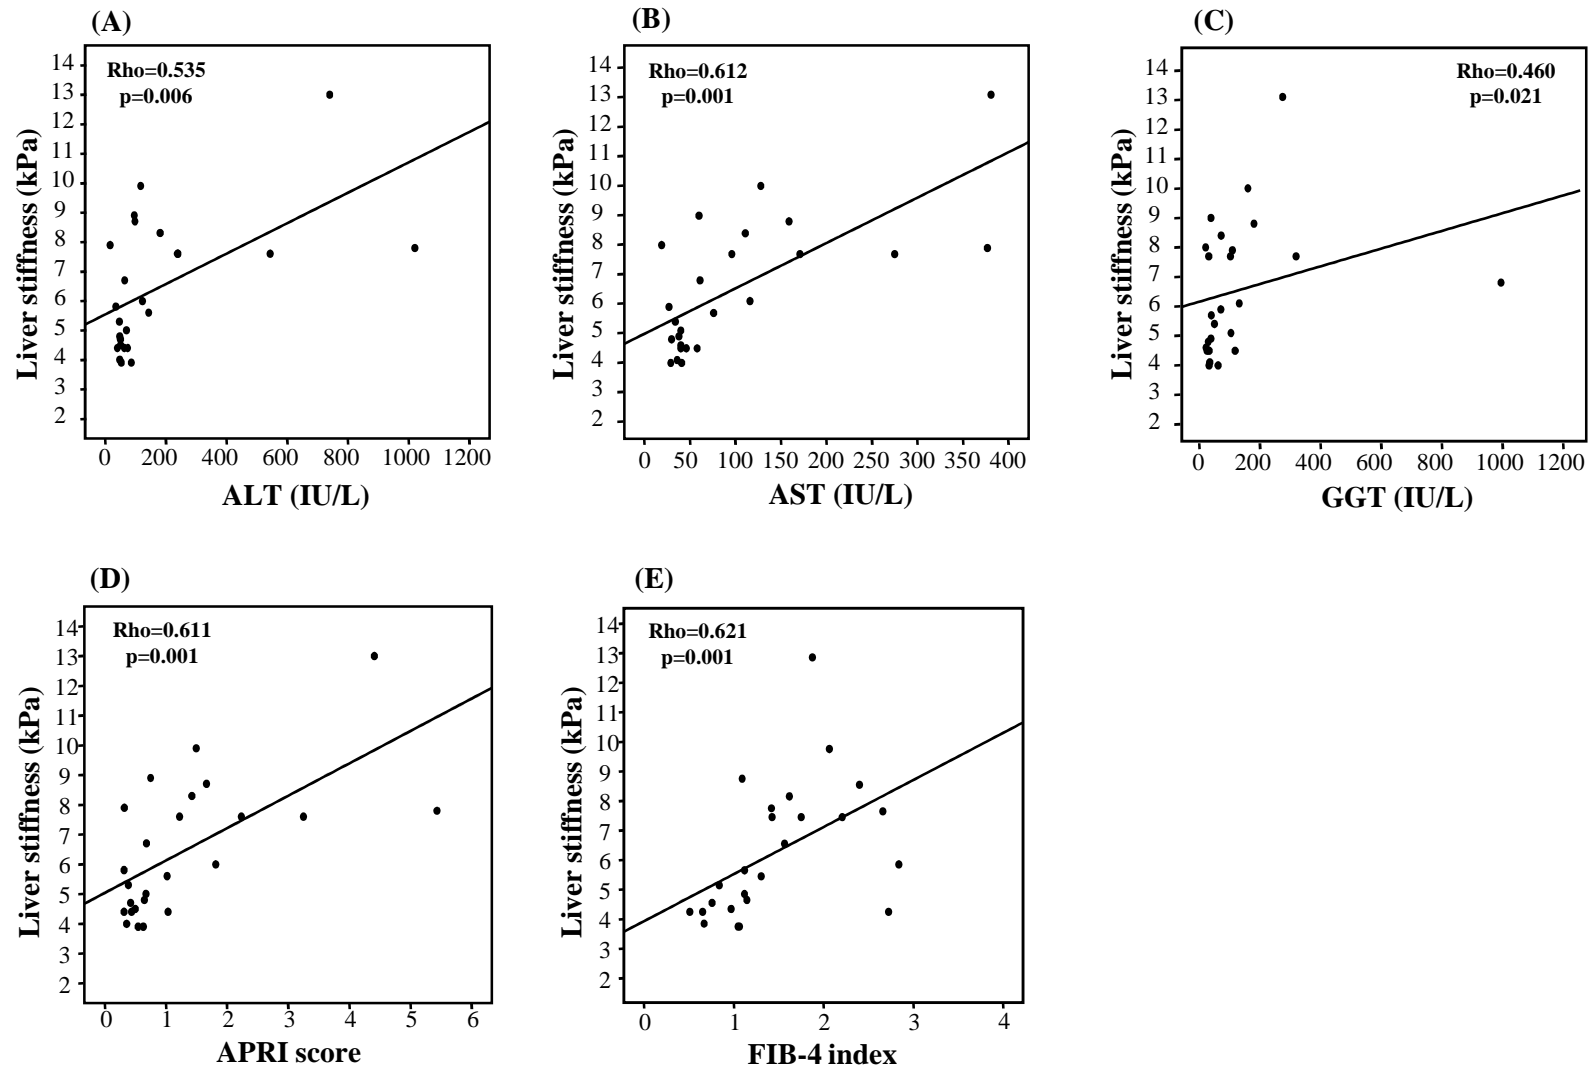

**Figure S2.** Scatter-plots showing the correlations between baseline (pre-DAA treatment) liver stiffness values (kPa) with ALT (A), AST (B), and GGT (C) liver enzyme levels, and with APRI score (D) and FIB-4 index (E) in HIV/HCV patients. Spearman's rank correlation coefficient and p-value are shown inside the graphs.
